# Supplementary material
Source: bioRxiv or medRxiv preprint supplement (https://www.biorxiv.org/highwire/filestream/60304/field_highwire_adjunct_files/0/198275-1.pdf)
Supplement: Supplementary file [file 198275-1.pdf]

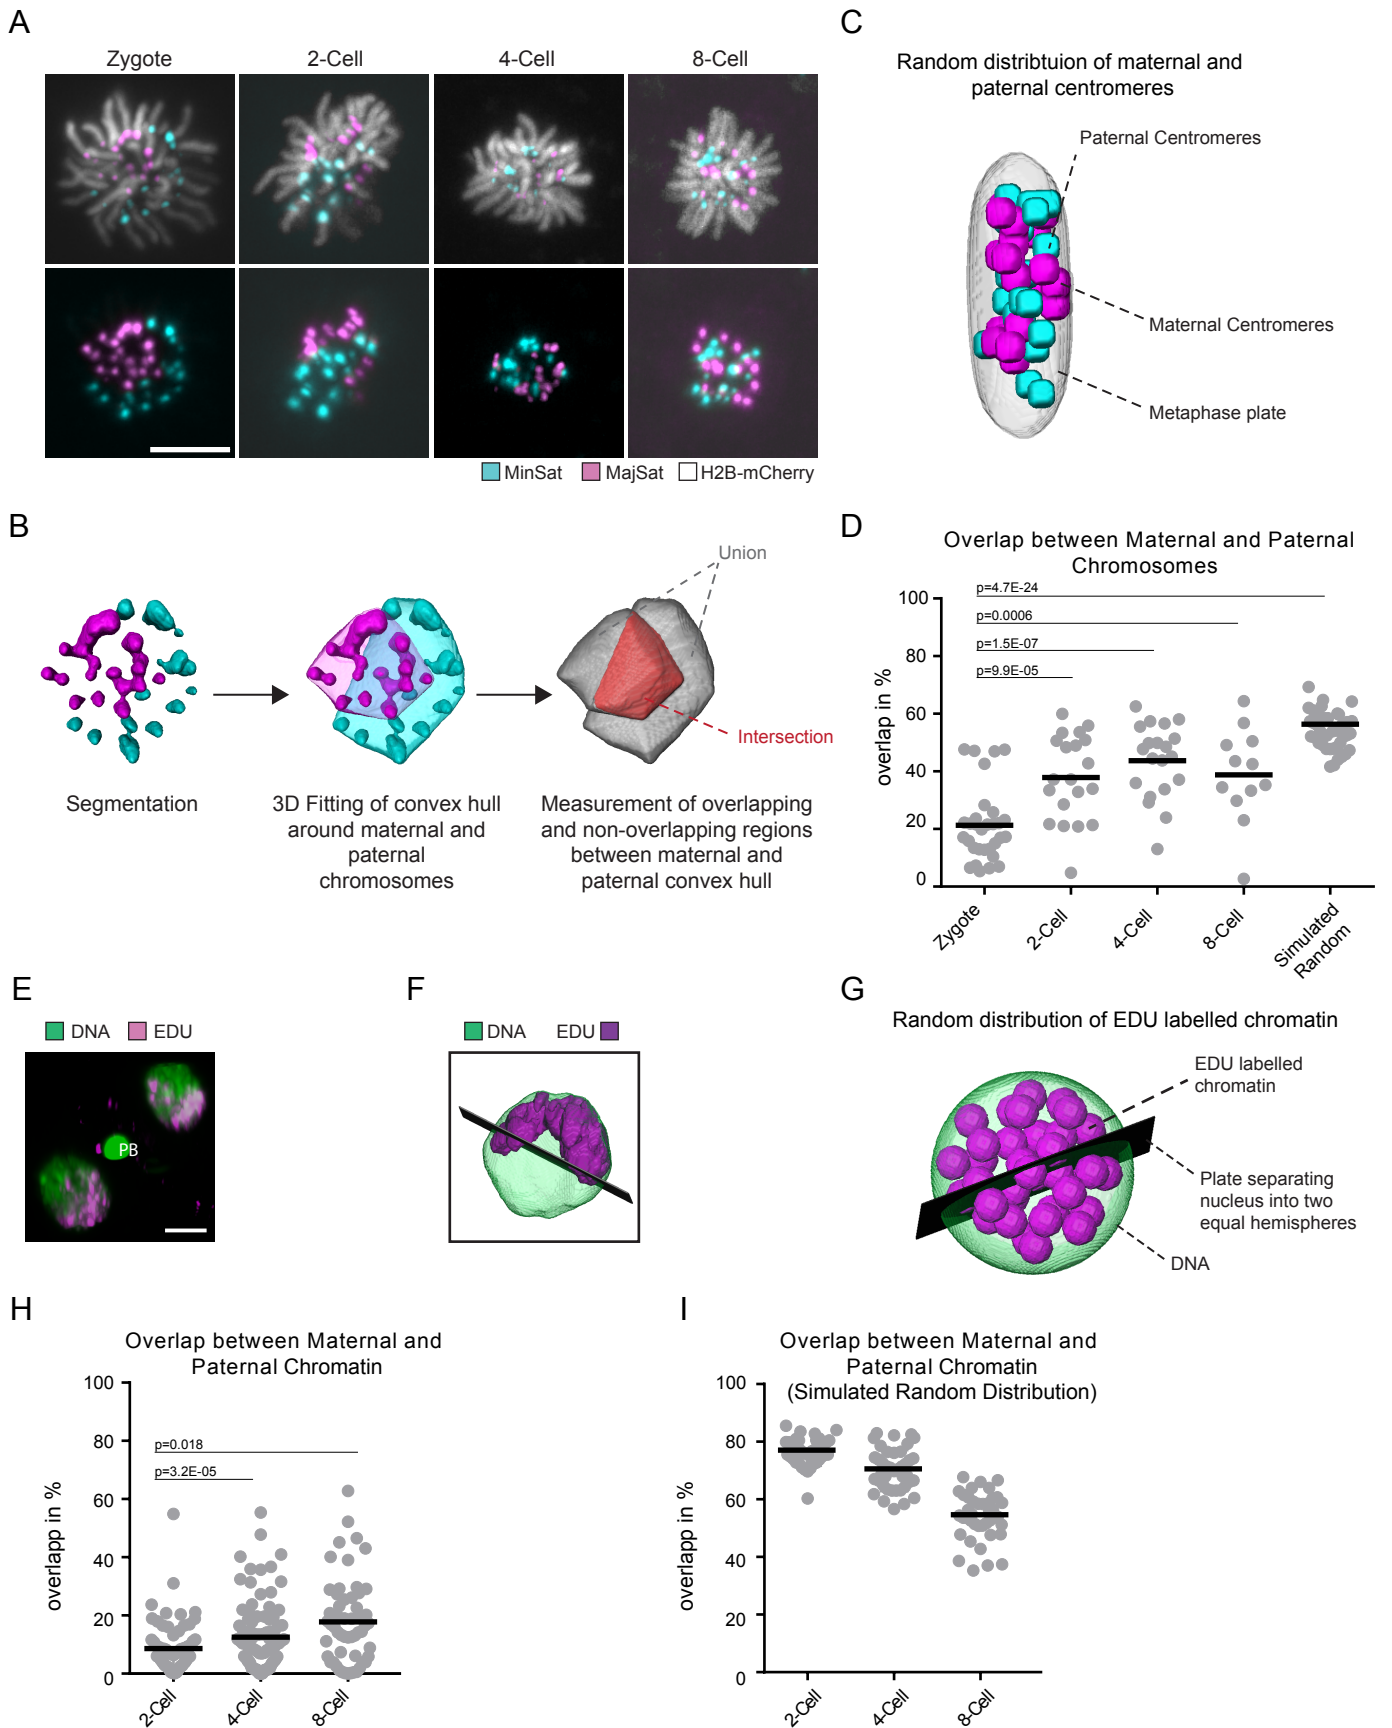

Supplementary Figure 1

**A**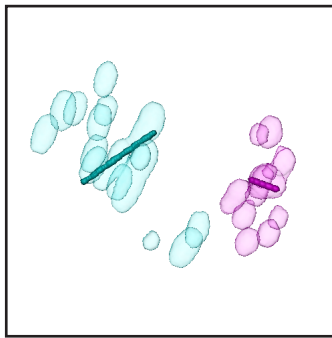

PatChr MatChr

**B**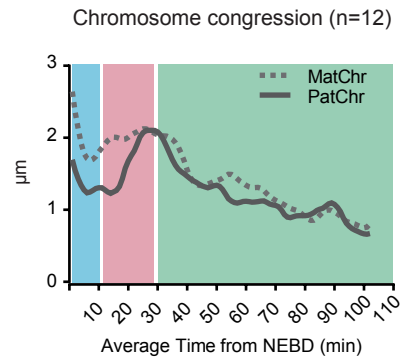**C**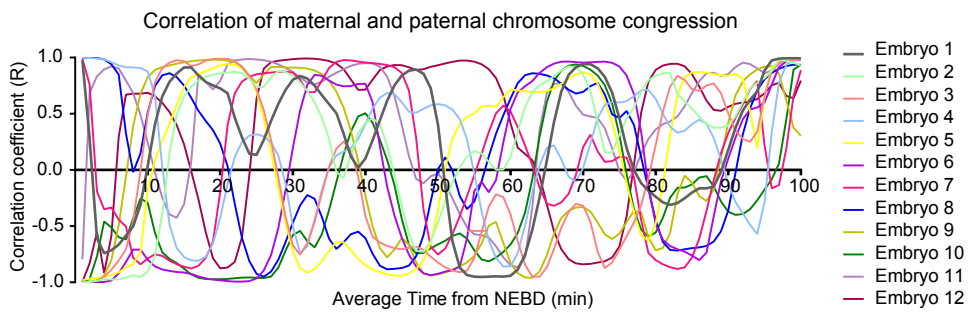**D**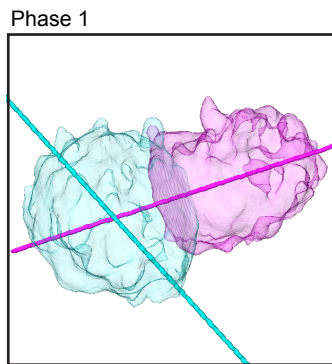

PatSpd MatSpd

**E**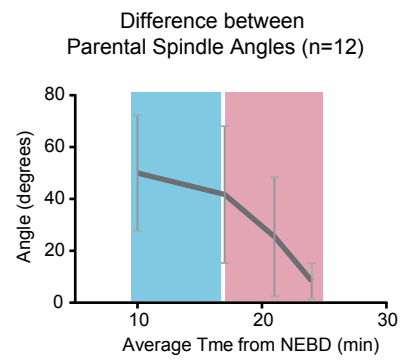

Supplementary Figure 2

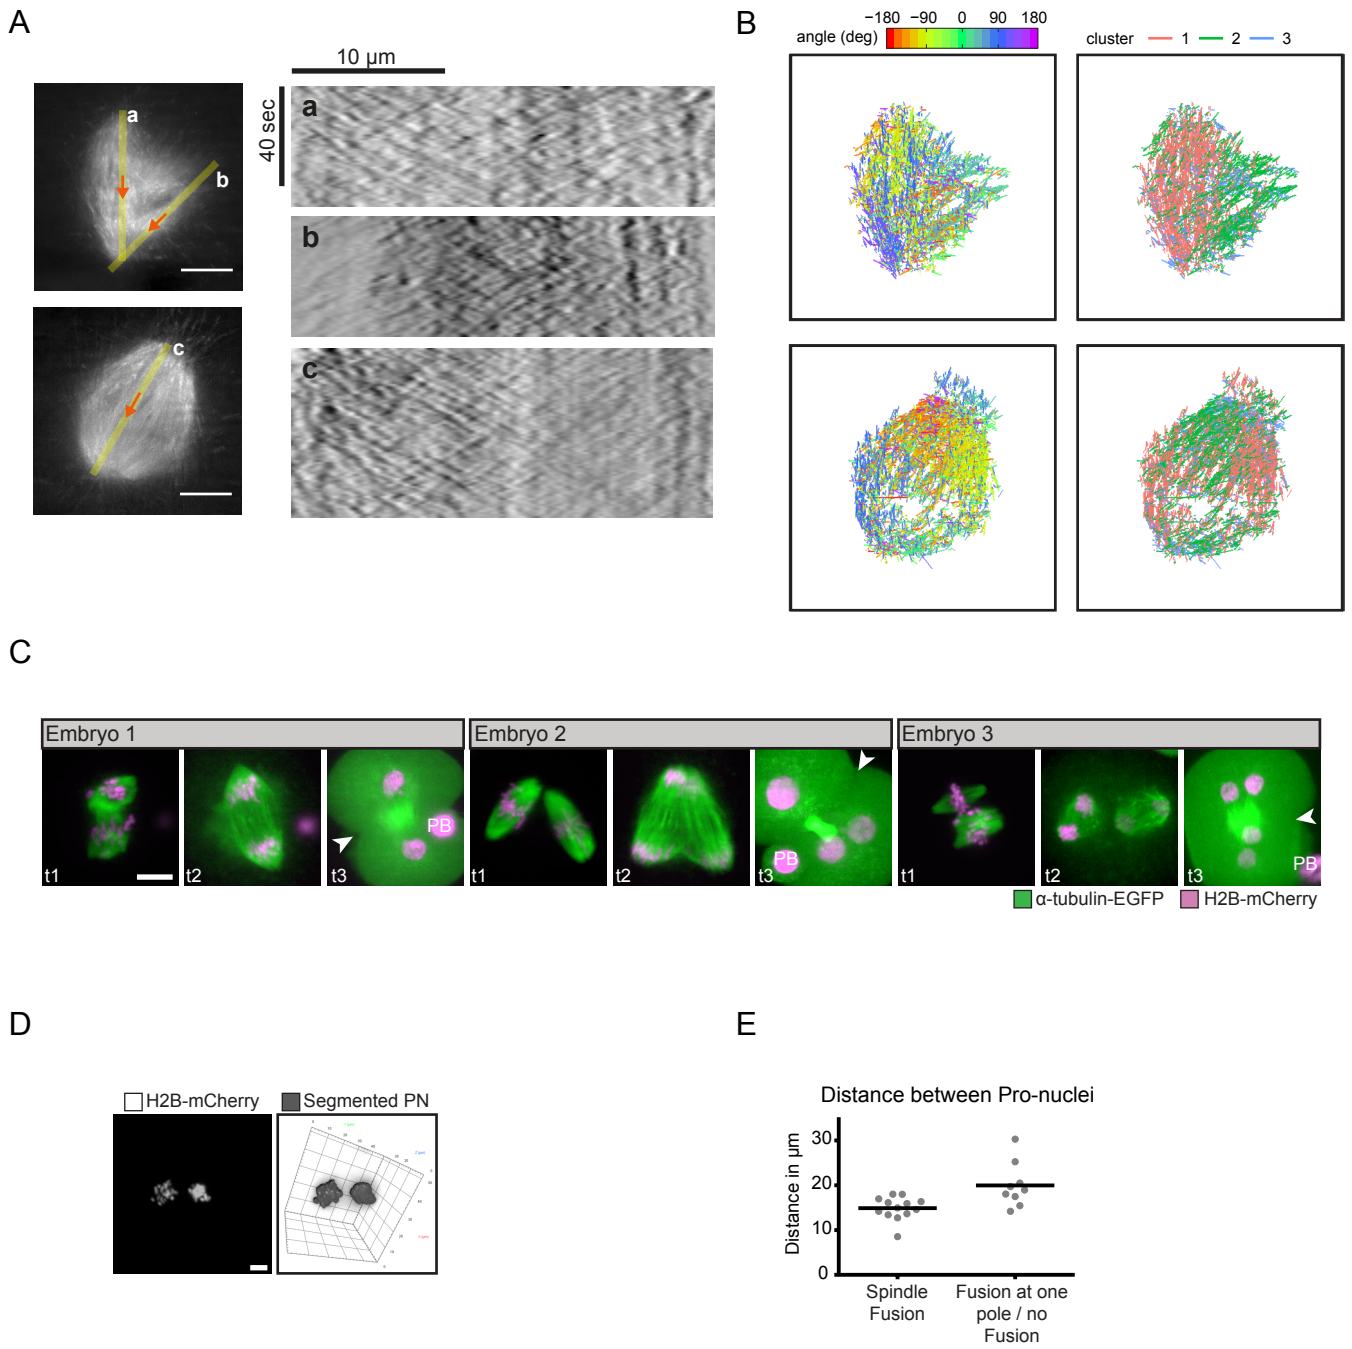

Supplementary Figure 3

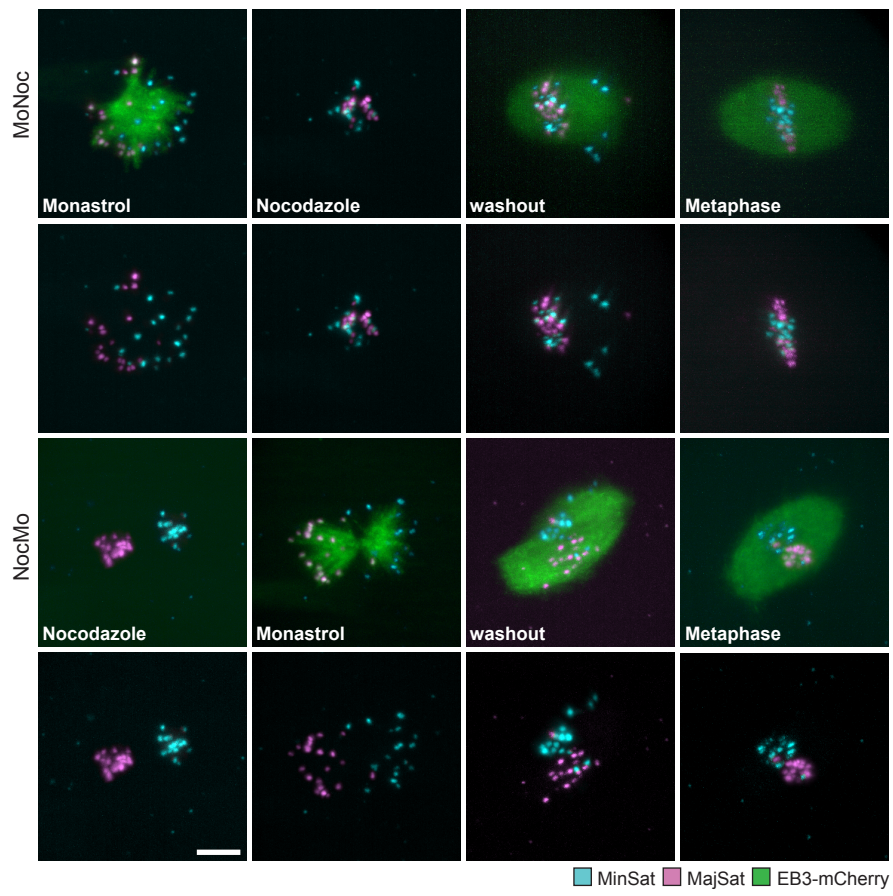

Supplementary Figure 4

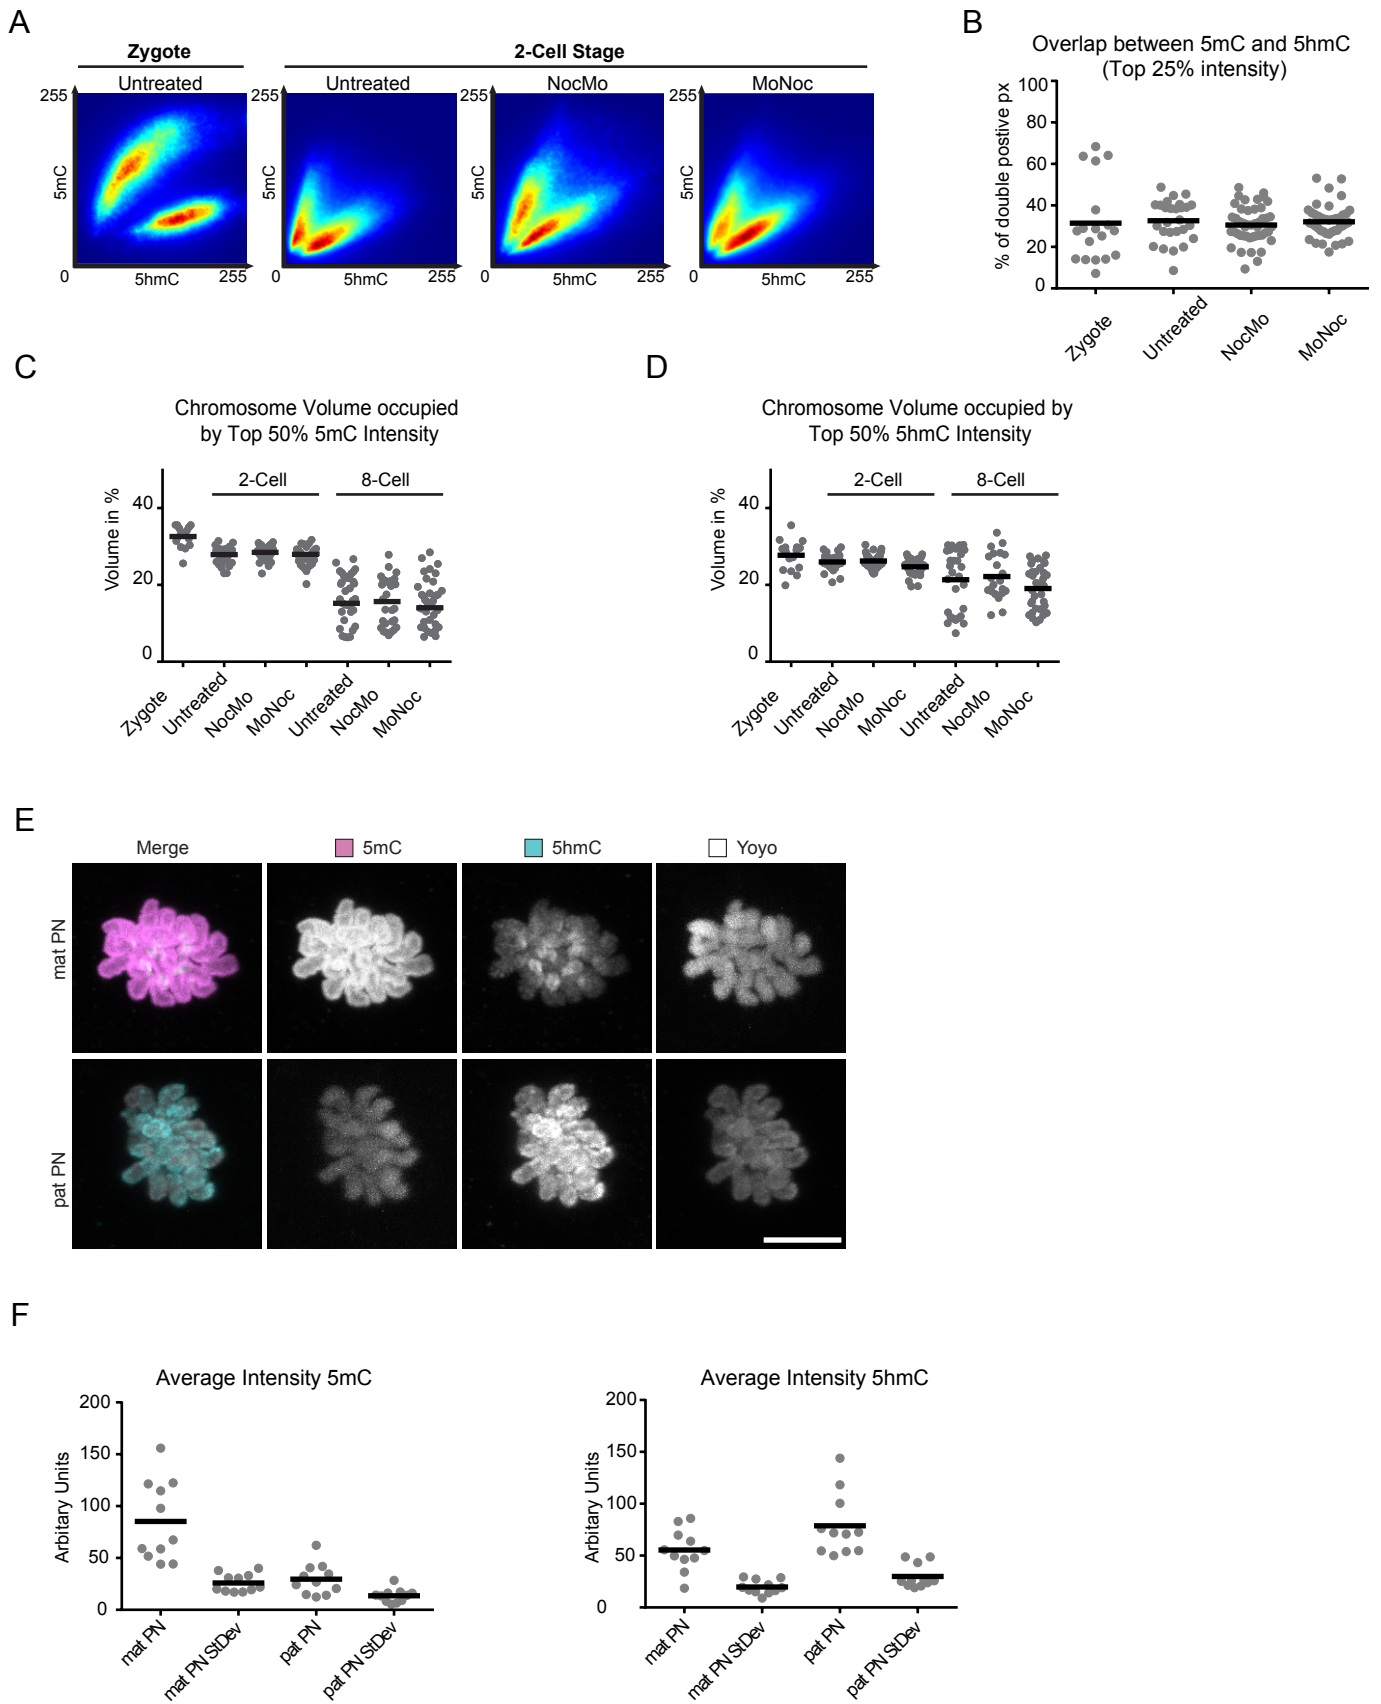

Supplementary Figure 5

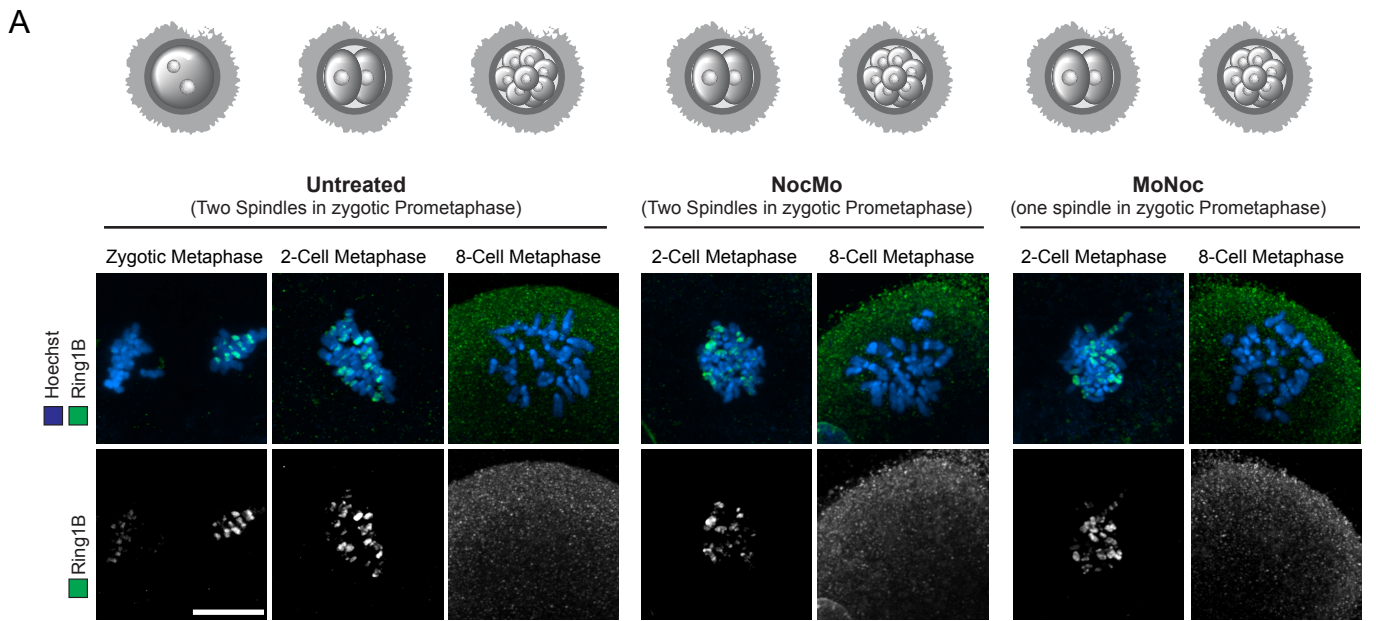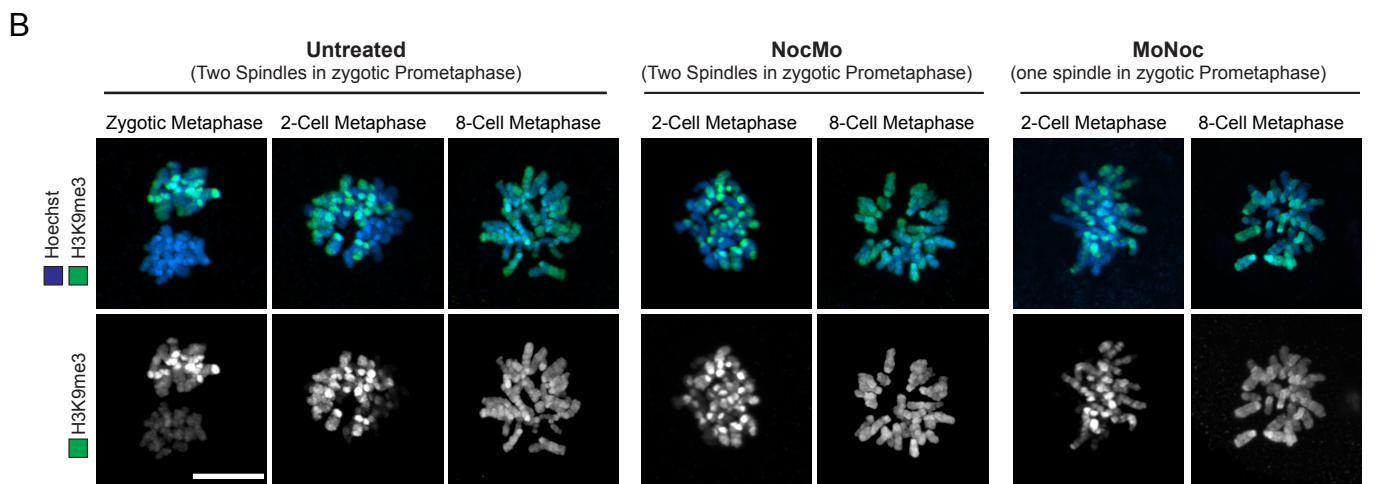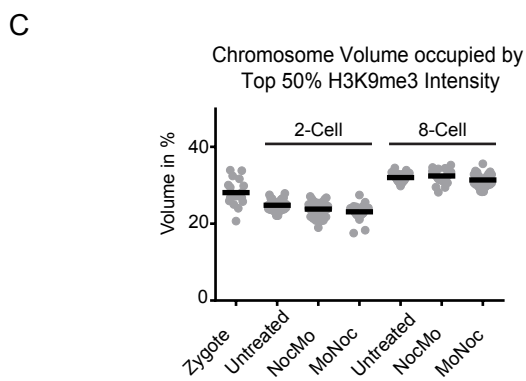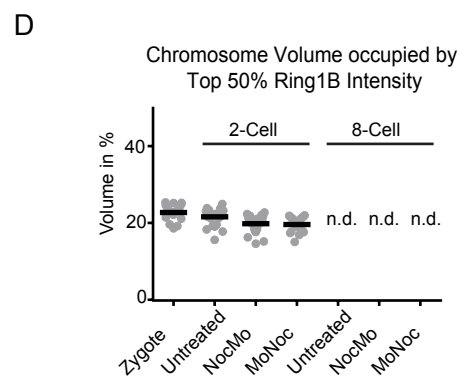

Supplementary Figure 6
